# Supplementary material for: Enteral Delivery of Pravastatin Sodium Tablets: Effect of Compounding into a Liquid Form and Co-Administration of Enteral Nutrition
Source: MDPI journal article supplement (doi:10.3390/pharmacy12010032), 2024-02-09
Supplement: s1 [file s1]

## Supplementary Material

of

# Enteral Delivery of Pravastatin Sodium Tablets: Effect of Compounding into a Liquid Form and of Co-Administration of Enteral Nutrition

Serena Logrippo <sup>1,2</sup>, Roberta Ganzetti <sup>3</sup>, Matteo Sestili<sup>4</sup>, Diego Romano Perinelli<sup>5</sup>, Marco Cespi<sup>5\*</sup> and Giulia Bonacucina<sup>5</sup>.

<sup>1</sup> Hospital Pharmacy, Santa Maria della Stella Hospital, USL Umbria 2, 05018 Orvieto, Italy; serena.logrippo@sanita.marche.it

<sup>2</sup> Hospital Pharmacy, Engles Profili Hospital, AST Ancona, 60044 Fabriano, Italy;

<sup>3</sup> Hospital Pharmacy, Carlo Urbani Hospital, AST Ancona, 60035 Jesi, Italy; roberta.ganzetti@sanita.marche.it

<sup>4</sup> Territorial Pharmaceutical Service, AST Ancona, 60035 Jesi, Italy; matteo.sestili@sanita.marche.it

<sup>5</sup> CHIP Building, School of Pharmacy, University of Camerino, via Madonna delle Carceri, 62032 Camerino, Italy; diego.perinelli@unicam.it (D.R.P.); giulia.bonacucina@unicam.it (G.B.)

\* Correspondence: marco.cespi@unicam.it; School of Pharmacy, University of Camerino, via Madonna delle Carceri, 62032 Camerino, Italy.

**Table S1:** Composition of the two nutrition formulae used in the study as provided by the manufacturers.

| Values for 100 mL of product | Nutricomp® Standard Fiber (NSF) | Nutrison® 1Kcal/mol (NWF) |
|------------------------------|---------------------------------|---------------------------|
| Energy (Kcal)                | 104                             | 100                       |
| Protein (g)                  | 3.8                             | 4.0                       |
| Fat (g)                      | 3.3                             | 3.9                       |
| Saturated                    | 0.9                             | 1                         |
| Mono-unsaturated             | 1.1                             | 2.2                       |
| Poly-unsaturated             | 1.3                             | 0.7                       |
| EPA                          | 0.04                            | 0.02                      |
| DHA                          | 0.03                            | 0.014                     |
| Carbohydrate (g)             | 13.8                            | 12.3                      |
| Sugar                        | 1.5                             | 0.7                       |
| Fiber (g)                    | 1.5                             | /                         |
